# Supplementary material for: Polychromatic Flow Cytometric Analysis of Stromal Vascular Fraction from Lipoaspirate and Microfragmented Counterparts Reveals Sex-Related Immunophenotype Differences
Source: MDPI journal article supplement (doi:10.3390/genes12121999), 2021-12-16
Supplement: s1 [file s1]

### Author Checklist: MIFlowCyt-Compliant Items

| Requirement                                 | Please Include Requested Information                                                                                                                                                                                                                                                                                                                                                                                                                                                                                                                                                                                                                                                                                                                                                                                                                                                                                                                                                                                                                                                                                                                                                                                                                                                                                                                                                                                                                                                                                                                                                                                                                                                                                                                                                                                                                      |
|---------------------------------------------|-----------------------------------------------------------------------------------------------------------------------------------------------------------------------------------------------------------------------------------------------------------------------------------------------------------------------------------------------------------------------------------------------------------------------------------------------------------------------------------------------------------------------------------------------------------------------------------------------------------------------------------------------------------------------------------------------------------------------------------------------------------------------------------------------------------------------------------------------------------------------------------------------------------------------------------------------------------------------------------------------------------------------------------------------------------------------------------------------------------------------------------------------------------------------------------------------------------------------------------------------------------------------------------------------------------------------------------------------------------------------------------------------------------------------------------------------------------------------------------------------------------------------------------------------------------------------------------------------------------------------------------------------------------------------------------------------------------------------------------------------------------------------------------------------------------------------------------------------------------|
| 1.1. Purpose                                | The purpose of the study was to characterize stromal vascular fraction cells from 16 osteoarthritic patients. From each patient two microfragmented lipoaspirate counterparts (named MLA and SVF), of which MLA was applied for cartilage treatment in OA, where compared with autologous lipoaspirate (named LA)                                                                                                                                                                                                                                                                                                                                                                                                                                                                                                                                                                                                                                                                                                                                                                                                                                                                                                                                                                                                                                                                                                                                                                                                                                                                                                                                                                                                                                                                                                                                         |
| 1.2. Keywords                               | Lipoaspirate, microfragmented lipoaspirate, immunophenotyping, endothelial progenitors, pericytes, supra-adventitial adipose stromal cells, sex.                                                                                                                                                                                                                                                                                                                                                                                                                                                                                                                                                                                                                                                                                                                                                                                                                                                                                                                                                                                                                                                                                                                                                                                                                                                                                                                                                                                                                                                                                                                                                                                                                                                                                                          |
| 1.3. Experiment variables                   | Microfragmented lipoaspirate treatment, gender.                                                                                                                                                                                                                                                                                                                                                                                                                                                                                                                                                                                                                                                                                                                                                                                                                                                                                                                                                                                                                                                                                                                                                                                                                                                                                                                                                                                                                                                                                                                                                                                                                                                                                                                                                                                                           |
| 1.4. Organization name and address          | Department for Translational Medicine, Srebrnjak Children's Hospital, Srebrnjak 100, Zagreb, Croatia                                                                                                                                                                                                                                                                                                                                                                                                                                                                                                                                                                                                                                                                                                                                                                                                                                                                                                                                                                                                                                                                                                                                                                                                                                                                                                                                                                                                                                                                                                                                                                                                                                                                                                                                                      |
| 1.5. Primary contact name and email address | Lucija Zenic, lzenic@bolnica-srebrnjak.hr                                                                                                                                                                                                                                                                                                                                                                                                                                                                                                                                                                                                                                                                                                                                                                                                                                                                                                                                                                                                                                                                                                                                                                                                                                                                                                                                                                                                                                                                                                                                                                                                                                                                                                                                                                                                                 |
| 1.6. Date or time period of experiment      | Data were collected and analysed between March 2021 and June 2021.                                                                                                                                                                                                                                                                                                                                                                                                                                                                                                                                                                                                                                                                                                                                                                                                                                                                                                                                                                                                                                                                                                                                                                                                                                                                                                                                                                                                                                                                                                                                                                                                                                                                                                                                                                                        |
| 1.7. Conclusions                            | <p>Comparative polychromatic flow cytometry analysis of cells in stromal vascular fraction isolated after collagenase treatment from three type of samples for each patient was performed.</p> <p>The immunophenotyping profile of MLA and SVF was dominated by reduction of leukocytes and augmentation of EP and pericytes, evidencing a marked enrichment of those cell populations in the course of adipose tissue microfragmentation. The increase of pericytes and EP as well as the decrease of leukocytes did not differ between MLA and SVF samples indicating that the method of lipoaspirate microfragmentation involving one centrifugation step was equally efficacious in the enrichment of the re-generative cell compartment as the method of concentrating stromal vascular fraction involving two centrifugation steps</p> <p>The pericytes/SA-ASC and EP/SA-ASC ratios were significantly higher in MLA and SVF samples compared to LA samples. The same ratios showed statistical difference when the samples from female and male patients were compared, however, statistically higher ratios in men were only seen in LA but not in MLA and SVF samples.</p> <p>Differential expression of the CD31 and CD34 markers reflecting two discerned sub-populations of endothelial progenitor cells was detected: the more abundant CD31<sup>+</sup>CD34<sup>+</sup> EP and the less abundant CD31<sup>high</sup>CD34<sup>high</sup>. The proportion of the CD31<sup>high</sup>CD34<sup>high</sup> EP was significantly higher while the proportion of CD31<sup>+</sup>CD34<sup>+</sup> EP was statistically lower in MLA and SVF compared to LA. Furthermore, the level of the CD31 and CD34 expression differed based on sex, and in female patients the proportion of CD31<sup>high</sup>CD34<sup>high</sup> EP was statistically</p> |

|                                                        |                                                                                                                                                                                                                                                                                                                                                                                                                                                                                                                                                                                                                                                                                                                                                                                                                                                                                                                                                                                                                                                                                                                                                                                                                                                                                                            |
|--------------------------------------------------------|------------------------------------------------------------------------------------------------------------------------------------------------------------------------------------------------------------------------------------------------------------------------------------------------------------------------------------------------------------------------------------------------------------------------------------------------------------------------------------------------------------------------------------------------------------------------------------------------------------------------------------------------------------------------------------------------------------------------------------------------------------------------------------------------------------------------------------------------------------------------------------------------------------------------------------------------------------------------------------------------------------------------------------------------------------------------------------------------------------------------------------------------------------------------------------------------------------------------------------------------------------------------------------------------------------|
|                                                        | <p>higher while the proportion of CD31<sup>+</sup>CD34<sup>+</sup> EP was statistically lower compared to male patients in all LA, MLA and SVF samples.</p> <p>With respect to the MSC marker expression significantly higher expression of the CD90, CD105 and CD146 markers was determined on CD31<sup>high</sup>CD34<sup>high</sup> EP in LA from female patients compared to their male counterparts. The same CD31<sup>high</sup>CD34<sup>high</sup> EP subpopulation showed significantly higher expression of CD105 in MLA samples and CD146 in SVF samples from female patients compared to male patients.</p> <p>When the same data were compared for CD31<sup>+</sup>CD34<sup>+</sup> EP and CD31<sup>high</sup>CD34<sup>high</sup> EP within each sex, statistically higher expression of the CD90, CD105 and CD146 markers was determined on CD31<sup>high</sup>CD34<sup>high</sup> EP in both female and male patients compared to its expression on CD31<sup>+</sup>CD34<sup>+</sup> from all LA, MLA and SVF samples.</p> <p>Analysis of MSC markers and the CD146 adhesion molecule expression in other progenitor populations revealed that female patients showed significantly higher expression of CD90 on pericytes and CD73 and CD90 on SA-ASC from all LA, MLA and SVF samples.</p> |
| 1.8. Quality control measures                          | FlowCheck-pro beads and Flow-Set Pro beads were used daily for QC and to monitor sensitivity. VersaComp beads was used for the compensation. All beads are from Beckman Coulter.                                                                                                                                                                                                                                                                                                                                                                                                                                                                                                                                                                                                                                                                                                                                                                                                                                                                                                                                                                                                                                                                                                                           |
| 2.1.1.1. (2.1.2.1., 2.1.3.1.) Sample description       | <p>1. LA = Human lipoaspirate</p> <p>2. MLA = Human microfragmented lipoaspirate (from LA, 1<sup>st</sup> time centrifuged using ACP® Double-Syringe System)</p> <p>3. SVF = Human microfragmented lipoaspirate (from MLA, 2<sup>nd</sup> time centrifuged using ACP® Double-Syringe System.)</p>                                                                                                                                                                                                                                                                                                                                                                                                                                                                                                                                                                                                                                                                                                                                                                                                                                                                                                                                                                                                          |
| 2.1.1.2. Biological sample source description          | LA, MLA and SVF samples were obtained from sixteen patients with osteoarthritis (8 males and 8 females, aged 33-66). The LA, MLA and SVF patient samples were delivered to the Srebrnjak Children's Hospital (Zagreb, Croatia) and immediately processed.                                                                                                                                                                                                                                                                                                                                                                                                                                                                                                                                                                                                                                                                                                                                                                                                                                                                                                                                                                                                                                                  |
| 2.1.1.3. Biological sample source organism description | Homo sapiens, 8 females, 8 males.                                                                                                                                                                                                                                                                                                                                                                                                                                                                                                                                                                                                                                                                                                                                                                                                                                                                                                                                                                                                                                                                                                                                                                                                                                                                          |
| 2.1.2.2. Environmental sample location                 | N/A                                                                                                                                                                                                                                                                                                                                                                                                                                                                                                                                                                                                                                                                                                                                                                                                                                                                                                                                                                                                                                                                                                                                                                                                                                                                                                        |
| 2.1.3. Other samples                                   | <p>Flow-Check Pro Fluorospheres (Beckman Coulter A63493)</p> <p>Flow-Set pro Fluorospheres (Beckman Coulter A63492)</p> <p>BD Anti-Mouse Ig, κ/Negative Control Compensation Particles Set (BD 552843)</p>                                                                                                                                                                                                                                                                                                                                                                                                                                                                                                                                                                                                                                                                                                                                                                                                                                                                                                                                                                                                                                                                                                 |
| 2.3. Sample treatment description                      | LA, MLA and SVF samples were digested with 1 % collagenase type I in D- MEM (both from Sigma-Aldrich, Saint Louis, MO, USA) in a shaking bath at 37°C for 45 minutes. After dilution 1:2 with 2% heat-inactivated fetal bovine serum (Biosera, Nuaille, France) in D-MEM (Sigma-Aldrich), samples were filtrated through a 100 µm-cell strainer (BD Falcon, Corning, NY) and washed with D-MEM (Sigma-Aldrich). Supernatants were discarded and cell pellets resuspended in 1 ml of D-MEM (Sigma-Aldrich). Samples were filtered through a 40 µm-cell strainer (BD Falcon, Corning, NY), washed with D-MEM (Sigma-Aldrich) and cell pellets resuspended in 1 ml of D-MEM D-MEM (Sigma-                                                                                                                                                                                                                                                                                                                                                                                                                                                                                                                                                                                                                     |

|                                            |                 |                                                                                                                                                                                                                                                                                                                       |                                         |                      |                                                                  |                                |
|--------------------------------------------|-----------------|-----------------------------------------------------------------------------------------------------------------------------------------------------------------------------------------------------------------------------------------------------------------------------------------------------------------------|-----------------------------------------|----------------------|------------------------------------------------------------------|--------------------------------|
|                                            |                 | Aldrich). Aliquote of 200µl from each sample was taken, cells counted on the Sysmex XT1800 counter (Sysmex, Kobe, Japan) and for each sample cell concentration adjusted to 3 x 10 <sup>6</sup> cell/ml.                                                                                                              |                                         |                      |                                                                  |                                |
| 2.4. Fluorescence reagent(s) description   |                 |                                                                                                                                                                                                                                                                                                                       |                                         |                      |                                                                  |                                |
| INSTRUMENT                                 |                 | ANTIBODIES / DYES                                                                                                                                                                                                                                                                                                     |                                         |                      |                                                                  |                                |
| LASER                                      | NAVIOS DETECTOR | TARGET                                                                                                                                                                                                                                                                                                                | Clone                                   | FLUOROCHROME / DYE   | CATALOG #                                                        | MANUFACTURER                   |
| 488nm                                      | FL1             | CD90                                                                                                                                                                                                                                                                                                                  | F15_42                                  | FITC                 | DURAClone SC Mesenchymal Tube reagent                            | Beckman Coulter                |
|                                            | FL2             | CD73                                                                                                                                                                                                                                                                                                                  | AD2                                     | PE                   | DURAClone SC Mesenchymal Tube reagent                            | Beckman Coulter                |
|                                            | FL3             | CD34                                                                                                                                                                                                                                                                                                                  | 581                                     | ECD                  | DURAClone SC Mesenchymal Tube reagent                            | Beckman Coulter                |
|                                            | FL4             | CD146                                                                                                                                                                                                                                                                                                                 | TEA1/34                                 | PC5.5                | DURAClone SC Mesenchymal Tube reagent                            | Beckman Coulter                |
|                                            | FL5             | CD105                                                                                                                                                                                                                                                                                                                 | TEA3_17                                 | PC7                  | DURAClone SC Mesenchymal Tube reagent                            | Beckman Coulter                |
| 638 nm                                     | FL6             | /                                                                                                                                                                                                                                                                                                                     | /                                       | /                    | /                                                                | /                              |
|                                            | FL7             | DNA                                                                                                                                                                                                                                                                                                                   | /                                       | DRAQ5                | DR50200                                                          | BioStatus                      |
|                                            | FL8             | CD45                                                                                                                                                                                                                                                                                                                  | J33                                     | AA750                | DURAClone SC Mesenchymal Tube reagent                            | Beckman Coulter                |
| 405 nm                                     | FL9             | CD31                                                                                                                                                                                                                                                                                                                  | 5_6E                                    | Pacific Blue         | DURAClone SC Mesenchymal Tube reagent                            | c                              |
|                                            | FL10            | CD14, CD19, Dead cells                                                                                                                                                                                                                                                                                                | RM052, J3-119, Live/Dead Fixable Yellow | Krome Orange, Yellow | DURAClone SC Mesenchymal Tube reagent + Live/Dead Fixable Yellow | Beckman Coulter , ThermoFisher |
| 3.1. Instrument manufacturer               |                 | Beckman Coulter                                                                                                                                                                                                                                                                                                       |                                         |                      |                                                                  |                                |
| 3.2. Instrument model                      |                 | Navios                                                                                                                                                                                                                                                                                                                |                                         |                      |                                                                  |                                |
| 3.3. Instrument configuration and settings |                 | The flow cytometer Navios has been configured by the manufacturer. For the set up of the instrument “EuroFlow SOP for Instrument set-up and compensation for Navios Instruments Version 1.4 was used ( <a href="https://www.euroflow.org/usr/pub/protocols.php">https://www.euroflow.org/usr/pub/protocols.php</a> ). |                                         |                      |                                                                  |                                |
| 3.3.1. Flow Cell and Fluidics              |                 | Sensing area: BioSense 150 µm x 460 µm rectangular cuvette. Flow-Check Pro and Flow-Set Pro beads were acquired at approximately 10 µl/min. Compensation beads, LA and MLA samples were acquired at approximately 60 µL/min.                                                                                          |                                         |                      |                                                                  |                                |
| 3.3.2. Light sources                       |                 | Navios is equipped with three solid-state, software controlled lasers.                                                                                                                                                                                                                                                |                                         |                      |                                                                  |                                |

|                                                          |                                                                                                                                                                                                                                                                                                                                                |
|----------------------------------------------------------|------------------------------------------------------------------------------------------------------------------------------------------------------------------------------------------------------------------------------------------------------------------------------------------------------------------------------------------------|
|                                                          | 1) 22 mW, blue laser operating at 488 nm, elliptical beam spot 10 $\mu\text{m}$ x 84 $\mu\text{m}$<br>2) 25 mW, diode laser operating at 638 nm, elliptical beam spot 9.6 $\mu\text{m}$ x 72 $\mu\text{m}$<br>3) 40 mW, violet laser operating at 405 nm, elliptical beam spot 8.9 $\mu\text{m}$ x 70 $\mu\text{m}$                            |
| 3.3.3. Optical filters                                   | Optical configuration and transmitted wavelengths are show at diagram bellow (diagram was taken from “Navios Flow Cytometer: Instructions for Use” manual that was supplied by Beckman Coulter at the time of instrument pucrchase during the year 2012.<br>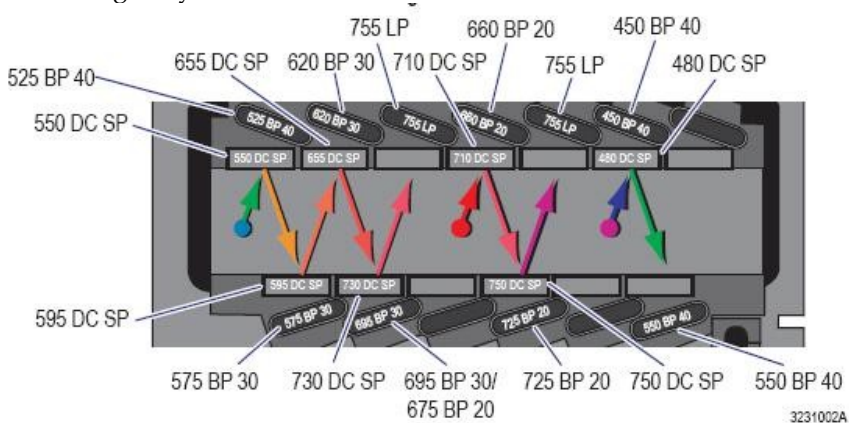 |
| 3.3.4. Optical detectors                                 | For 488 nm laser: FL1 – FL5<br>For 638 nm laser: FL6 – FL8<br>For 405 laser: FL9 - FL10                                                                                                                                                                                                                                                        |
| 3.3.4.1. Optical detector types, voltages, amplification | Data about detector and instrument settings are listed in table below:                                                                                                                                                                                                                                                                         |

| Laser   | Detector | Detector type        | Parameter / Fluorochrome             | Target channel value (MFI) for Flow-Set Pro Beads | Voltage settings | Amplific ation |
|---------|----------|----------------------|--------------------------------------|---------------------------------------------------|------------------|----------------|
| 2488 nm | Wide     | Segmented photodiode | FSC Intensity and FSC Time of Flight | /                                                 |                  | Linear         |
|         | /        | Photodiode           | SSC Intensity and SSC Time of Flight | /                                                 |                  | Linear         |
|         | FL1      | PMT                  | FITC                                 | 68-76                                             | 500              | Log            |
|         | FL2      | PMT                  | PE                                   | 232-262                                           | 500              | Log            |
|         | FL3      | PMT                  | ECD                                  | 146-166                                           | 425              | Log            |
|         | FL4      | PMT                  | PC5..5                               | 116-124                                           | 550              | Log            |
|         | FL5      | PMT                  | PC7                                  | 54-58                                             | 570              | Log            |
| 638 nm  | FL6      | PMT                  | APC                                  | 15-17                                             | 485              | Log            |

|                                  |      |                                                                                                                                                                                                                                                                                                                                                                                                                                                                                                                                                                                                                                                                                                                                                                                                                                                                                                                                                                                                                                                                                                                                                                                                                                                                                                                                                                                                                                                                                                                                                                                                                   |                  |         |     |     |
|----------------------------------|------|-------------------------------------------------------------------------------------------------------------------------------------------------------------------------------------------------------------------------------------------------------------------------------------------------------------------------------------------------------------------------------------------------------------------------------------------------------------------------------------------------------------------------------------------------------------------------------------------------------------------------------------------------------------------------------------------------------------------------------------------------------------------------------------------------------------------------------------------------------------------------------------------------------------------------------------------------------------------------------------------------------------------------------------------------------------------------------------------------------------------------------------------------------------------------------------------------------------------------------------------------------------------------------------------------------------------------------------------------------------------------------------------------------------------------------------------------------------------------------------------------------------------------------------------------------------------------------------------------------------------|------------------|---------|-----|-----|
|                                  | FL7  | PMT                                                                                                                                                                                                                                                                                                                                                                                                                                                                                                                                                                                                                                                                                                                                                                                                                                                                                                                                                                                                                                                                                                                                                                                                                                                                                                                                                                                                                                                                                                                                                                                                               | DRAQ7            | 260-296 | 450 | Log |
|                                  | FL8  | PMT                                                                                                                                                                                                                                                                                                                                                                                                                                                                                                                                                                                                                                                                                                                                                                                                                                                                                                                                                                                                                                                                                                                                                                                                                                                                                                                                                                                                                                                                                                                                                                                                               | AA750            | 73-83   | 485 | Log |
| 405 nm                           | FL9  | PMT                                                                                                                                                                                                                                                                                                                                                                                                                                                                                                                                                                                                                                                                                                                                                                                                                                                                                                                                                                                                                                                                                                                                                                                                                                                                                                                                                                                                                                                                                                                                                                                                               | Pacific Blue     | 55-61   | 425 | Log |
|                                  | FL10 | PMT                                                                                                                                                                                                                                                                                                                                                                                                                                                                                                                                                                                                                                                                                                                                                                                                                                                                                                                                                                                                                                                                                                                                                                                                                                                                                                                                                                                                                                                                                                                                                                                                               | Live/Dead Yellow | 110-124 | 348 | Log |
|                                  |      |                                                                                                                                                                                                                                                                                                                                                                                                                                                                                                                                                                                                                                                                                                                                                                                                                                                                                                                                                                                                                                                                                                                                                                                                                                                                                                                                                                                                                                                                                                                                                                                                                   |                  |         |     |     |
| 4.2. Compensation description    |      | Tubes with single dried DuraClone reagent were used for compensation samples as follow: CD4 FITC, CD4 PE, CD34 ECD, CD146 PE-Cy5.5, CD105 PE-Cy7, CD45 APC-AlexaFluor750 and CD8 Pacific Blue. VersaComp beads were added to each tube. Then 100 µl of PBS was added, tubes briefly vortexed and proceeded further in the same manner as the DuraClone SC tubes. For the DRAQ5, compensation mixture of DRAQ5 stained and unstained SVF cells was used. Compensation was not performed for the Live/Dead Fixable Yellow stain because only negative cells were used in analysis of MSCs.                                                                                                                                                                                                                                                                                                                                                                                                                                                                                                                                                                                                                                                                                                                                                                                                                                                                                                                                                                                                                          |                  |         |     |     |
| 4.3. Data transformation details |      | N/A                                                                                                                                                                                                                                                                                                                                                                                                                                                                                                                                                                                                                                                                                                                                                                                                                                                                                                                                                                                                                                                                                                                                                                                                                                                                                                                                                                                                                                                                                                                                                                                                               |                  |         |     |     |
| 4.4.1. Gate description          |      | <p>Gating procedures applied was, with minor modifications, as described in article:<br/> Polancec, D.; Zenic, L.; Hudetz, D.; Boric, I.; Jelec, Z.; Rod, E.; Vrdoljak, T.; Skelin, A.; Plecko, M.; Turkalj, M.; Nogalo, B.; Primorac, D. Immunophenotyping of a Stromal Vascular Fraction from Microfragmented Lipoaspirate Used in Osteoarthritis Cartilage Treatment and Its Lipoaspirate Counterpart. Genes 2019, 10, 474.</p> <p>The gating tree was set as follows (as shown on Figures :</p> <ol style="list-style-type: none"> <li>1. FSC LIN/FSC TOF: „Singlets“: exclusion of doublets, to</li> <li>2. SSC/DRAQ5: „Nucleated cells“: exclusion of debris and selection of nucleated cells, to</li> <li>3. DRAQ5/CD45 APC-AlexaFluor750: Selection of CD45<sup>+</sup> cells and CD45<sup>-</sup> cells</li> <li>4. CD45<sup>-</sup> cells were further analysed on CD34 ECD / CD31 Pacific Blue for the determination of CD31<sup>+</sup>CD34<sup>-</sup> endothelial mature cells, determination of CD31<sup>+</sup>CD34<sup>+</sup> endothelial progenitor cells and selection of CD31<sup>-</sup> cells for further analysis</li> <li>5. CD31<sup>-</sup> cells were further analysed for CD34 ECD/CD146 PC5.5for the determination of CD34<sup>-</sup>CD146<sup>+</sup> pericytes and CD34<sup>+</sup>CD146<sup>-</sup> supra-adventitial adipose stromal cells.</li> <li>6. CD31<sup>+</sup>CD34<sup>+</sup> endothelial progenitor cells were divided into CD31<sup>high</sup>CD34<sup>high</sup> endothelial progenitors and CD31<sup>+</sup>CD34<sup>+</sup> endothelial progenitors</li> </ol> |                  |         |     |     |
| 4.4.2. Gate statistics           |      | Percentage positive from nucleated events were determined for CD45 <sup>+</sup> cells and percentage positive from live nucleated CD45 <sup>-</sup> events for endothelial progenitor cells, pericytes and SA-ASC.                                                                                                                                                                                                                                                                                                                                                                                                                                                                                                                                                                                                                                                                                                                                                                                                                                                                                                                                                                                                                                                                                                                                                                                                                                                                                                                                                                                                |                  |         |     |     |

|                        |                                                                                                                                                                                                                                                                                                                                                                                                                                                              |
|------------------------|--------------------------------------------------------------------------------------------------------------------------------------------------------------------------------------------------------------------------------------------------------------------------------------------------------------------------------------------------------------------------------------------------------------------------------------------------------------|
|                        | <p>Percentage positive from endothelial progenitors were determined for CD31<sup>high</sup>CD34<sup>high</sup> and CD31<sup>+</sup>CD34<sup>+</sup> endothelial progenitors.</p> <p>Geometric mean fluorescence intensity was determined for mesenchymal stem/stromal cell-characteristic surface markers CD73, CD90, CD105 as well as for CD146 cell surface marker, on endothelial progenitors, pericytes and supra-adventitial adipose stromal cells.</p> |
| 4.4.3. Gate boundaries | <p>Regions and gates were positioned according to gating strategies published in article listed under the 4.4.1. section. Batch processing of the FCS data analysis was performed for all eighteen samples and regions and gates minimally adjusted were needed.</p>                                                                                                                                                                                         |
